# Supplementary material
Source: publisher site journal article supplement (https://www.dovepress.com/article/302620)
Supplement: Supplementary file 1 [file get_supplementary_file.php]

***Functional status geriatric scores: single-handed tools in the risk of 30-day mortality after hip fracture***

**Supplementary Table 1**.

30-day death probability after hip fracture surgery with 95% confidence interval along the geriatric scores (BI, KI, LBI and PRCS) analized.

|  | | 30-day  Death Probability | 95% CI |
| --- | --- | --- | --- |
| Complete study population | | 0.059 | 0.045-0.076 |
| Barthel Index | | | |
|  | Independent (100) | 0.037 | 0.015-0.074 |
|  | Slight dependence (60-95) | 0.047 | 0.031-0.068 |
|  | Moderate dependence (40-55) | 0.116 | 0.072-0.176 |
|  | Severe dependence (20-35) | 0.063 | 0.022-0.144 |
|  | Complete dependence (<20) | 0.118 | 0.025-0.327 |
| BI Cut Off (0-55) | | 0.102 | 0.067-0.146 |
| BI Cut Off (60-100) | | 0.045 | 0.031-0.062 |
| Katz Index | | | |
|  | A | 0.035 | 0.018-0.061 |
|  | B | 0.049 | 0.022-0.093 |
|  | C | 0.042 | 0.019-0.081 |
|  | D | 0.078 | 0.039-0.138 |
|  | E | 0.106 | 0.049-0.197 |
|  | F | 0.123 | 0.065-0.208 |
|  | G | 0.073 | 0.021-0.183 |
| KI Cut Off (A-B) | | 0.039 | 0.024-0.061 |
| KI Cut Off (C-G) | | 0.077 | 0.055-0.104 |
| Lawton-Brody Index | | | |
|  | 0 | 0.086 | 0.052-0.133 |
|  | 1 | 0.076 | 0.040-0.130 |
|  | 2 | 0.064 | 0.035-0.109 |
|  | 3 | 0.038 | 0.013-0.087 |
|  | 4 | 0.038 | 0.008-0.118 |
|  | 5 | 0.059 | 0.012-0.176 |
|  | 6 | 0.028 | 0.003-0.123 |
|  | 7 | 0.025 | 0.005-0.079 |
|  | 8 | 0.049 | 0.019-0.103 |
| LBI Cut Off (0-3) | | 0.069 | 0.051-0.091 |
| LBI Cut Off (4-8) | | 0.039 | 0.022-0.066 |
| Physical Red Cross Scale | | | |
|  | Full ambulatory capability (0) | 0.029 | 0.003-0.129 |
|  | Slight difficulty – no technical aids (1) | 0.039 | 0.020-0.068 |
|  | One supporting point (2) | 0.054 | 0.034-0.083 |
|  | Two supporting points (3) | 0.083 | 0.053-0.122 |
|  | Wheel chair (4) | 0.114 | 0.040-0.249 |

*BI: Barthel Index. KI: Katz Index. LBI: Lawton-Brody Index. CI: Confidence interval.*

***Functional status geriatric scores: single-handed tools in the risk of 30-day mortality after hip fracture***

**Supplementary Table 2**.

Univariate and multivariate analysis for 30-day mortality risk after hip fracture surgery.

|  | | | Odd Ratio | 95% CI | p-value |
| --- | --- | --- | --- | --- | --- |
| Age (year) | | | 1.071 | 1.023-1.122 | 0.003 |
| Gender (male) | | | 2.044 | 1.159-3.607 | 0.014 |
| Barthel Index | | | | |  |
|  | Univariate (per point) | | 0.986 | 0.975-0.996 | 0.010 |
|  | Multivariate | | 0.988 | 0.977-1.000 | 0.043 |
|  |  | Age (year) | 1.066 | 1.017-1.118 | 0.008 |
|  |  | Gender (male) | 2.358 | 1.320-4.210 | 0.004 |
| Katz Index | | | | |  |
|  | Univariate | | 1.254 | 1.089-1.444 | 0.002 |
|  | Multivariate | | 1.224 | 1.057-1.418 | 0.007 |
|  |  | Age (year) | 1.066 | 1.017-1.117 | 0.008 |
|  |  | Gender (male) | 2.386 | 1.333-4.272 | 0.003 |
| Lawton-Brody Index | | | | |  |
|  | Univariate | | 0.885 | 0.788-0.992 | 0.037 |
|  | Multivariate | | 0.930 | 0.821-1.054 | 0.258 |
|  |  | Age (year) | 1.070 | 1.020-1.122 | 0.006 |
|  |  | Gender (male) | 2.211 | 1.241-3.942 | 0.007 |
| Physical Red Cross Scale | | | | |  |
|  | Univariate | | 1.483 | 1.094-2.011 | 0.011 |
|  | Multivariate | | 1.375 | 1.004-1.884 | 0.047 |
|  |  | Age (year) | 1.068 | 1.018-1.120 | 0.007 |
|  |  | Gender (male) | 2.316 | 1.299-4.130 | 0.004 |

*CI: Confidence interval.*
